# Supplementary material for: Achieving Lower LDL-C Levels After a Recent Myocardial Infarction Might Be Associated with Lower Healthcare Resource Use and Costs in Spain
Source: PubMed Central journal article supplement — Adv Ther. 2022 Jun 11;39(8):3578–88. doi: 10.1007/s12325-022-02187-1 (PMC9309133; doi:10.1007/s12325-022-02187-1), 2022-06-11
Supplement: 12325_2022_2187_MOESM1_ESM.pdf [file 12325_2022_2187_MOESM1_ESM.pdf]

**Achieving lower LDL-C levels after a recent myocardial infarction  
might be associated with lower healthcare resource use and costs in  
Spain**

Carlos Escobar-Cervantes<sup>1\*</sup>, Guillermo Villa<sup>2</sup>, Ignasi Campos-Tapias<sup>3</sup>, Francesc Sorio-Vilela<sup>2</sup>, Javier Lozano<sup>3</sup>, Doreen A Kahangire<sup>2</sup>, Miriam Fernandez-Delgado<sup>3</sup>, Aram Sicras-Navarro<sup>4</sup> and Antoni Sicras-Mainar<sup>4</sup>

<sup>1</sup>Hospital La Paz, Madrid, Spain. <sup>2</sup>Amgen (Europe) GmbH, Rotkreuz, Switzerland. <sup>3</sup>Amgen S.A., Barcelona, Spain. <sup>4</sup>Atrys Health, Barcelona, Spain.

**Corresponding author**

Dr Carlos Escobar-Cervantes

Cardiology department

University Hospital La Paz

Paseo de La Castellana 261

28046, Madrid

Spain

Email: [escobar\\_cervantes\\_carlos@hotmail.com](mailto:escobar_cervantes_carlos@hotmail.com)

## Supplementary figure

Figure S1 Flowchart of inclusion and exclusion criteria

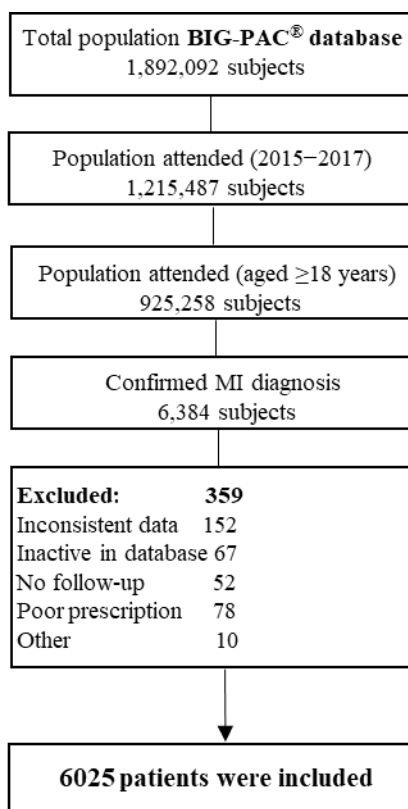

MI, myocardial infarction.

## Supplementary tables

**Table S1** Breakdown of unit costs per healthcare resource

| <b>Resources</b>                     | <b>Unit costs (€)</b> |
|--------------------------------------|-----------------------|
| Direct costs – medical visits        |                       |
| Medical visits and primary care      | 23.2                  |
| Emergency room visit                 | 117.5                 |
| Hospitalization (per day)            | 420.9                 |
| Specialist medical visit             | 92.0                  |
| Direct costs – supplementary tests   |                       |
| Laboratory tests                     | 22.3                  |
| Conventional radiology               | 18.5                  |
| Magnetic nuclear resonance           | 177.0                 |
| Computerized axial tomography        | 96.0                  |
| Diagnostic test/therapeutic          | 37.1                  |
| Indirect costs – work productivity   |                       |
| Cost per day not worked <sup>a</sup> | 101.2                 |

<sup>a</sup>Calculated using the average interprofessional salary in Spain as a proxy.

**Table S2** Descriptive statistics of direct and indirect costs during the 18 months post MI, according to achieved LDL-C level

|                       | <55 mg/dL           | 55–69 mg/dL         | 70–99 mg/dL         | 100–129 mg/dL       | ≥130 mg/dL          | Overall             |
|-----------------------|---------------------|---------------------|---------------------|---------------------|---------------------|---------------------|
| <b>Direct costs</b>   |                     |                     |                     |                     |                     |                     |
| Mean (SD)             | 2,279 (1,312)       | 2,303 (1,549)       | 2,394 (1,816)       | 2,594 (2,118)       | 2,868 (2,296)       | 2,543 (2,002)       |
| Median (IQR)          | 1,882 (1,289–2,742) | 1,864 (1,205–2,926) | 1,832 (1,194–2,887) | 1,852 (1,228–2,989) | 1,989 (1,373–3,415) | 1,867 (1,239–2,996) |
| <b>Indirect costs</b> |                     |                     |                     |                     |                     |                     |
| Mean (SD)             | 3,507 (6,225)       | 3,611 (7,014)       | 4,214 (7,045)       | 4,162 (8,065)       | 4,178 (7,960)       | 4,125 (7,566)       |
| Median (IQR)          | 0 (0–6,149)         | 0 (0–3,593)         | 0 (0–7,287)         | 0 (0–4,048)         | 0 (0–5,263)         | 0 (0–6,326)         |

IQR, interquartile range; LDL-C, low-density lipoprotein cholesterol; MI, myocardial infarction; SD, standard deviation.

**Table S3** Descriptive statistics of direct and indirect costs during the 18 months post MI, according to intensity of LLT

|                       | <b>Ezetimibe<br/>monotherapy</b> | <b>Low-intensity<br/>statin</b> | <b>Moderate-intensity<br/>statin</b> | <b>High-intensity<br/>statin</b> | <b>Ezetimibe with a<br/>statin</b> | <b>Overall</b>          |
|-----------------------|----------------------------------|---------------------------------|--------------------------------------|----------------------------------|------------------------------------|-------------------------|
| <b>Direct costs</b>   |                                  |                                 |                                      |                                  |                                    |                         |
| Mean (SD)             | 3,120 (2,283)                    | 2,458 (2,250)                   | 2,363 (2,112)                        | 2,553 (1,922)                    | 3,116 (1,870)                      | 2,543 (2,002)           |
| Median (IQR)          | 2,101 (1,590 -<br>3,436)         | 1,492 (1,052–<br>2,840)         | 1,588 (1,054–2,685)                  | 1,936 (1,303–2,996)              | 2,627 (1,917–3,744)                | 1,867 (1,239–<br>2,996) |
| <b>Indirect costs</b> |                                  |                                 |                                      |                                  |                                    |                         |
| Mean (SD)             | 5,320 (8,812)                    | 4,533 (8,759)                   | 4,264 (9,189)                        | 4,022 (6,751)                    | 3,742 (6,633)                      | 4,125 (7,566)           |
| Median (IQR)          | 0 (0–12,854)                     | 0 (0–2,687)                     | 0 (0–3,891)                          | 0 (0–7,287)                      | 0 (0–6,275)                        | 0 (0–6,326)             |

IQR, interquartile range; LLT, lipid-lowering therapy; MI, myocardial infarction; SD, standard deviation.

**Table S4** Direct and indirect costs during the 18 months post MI, according to achieved LDL-C level: ANCOVA with bootstrapping versus Poisson regression models

|                                  | <55 mg/dL | 55–69 mg/dL | 70–99 mg/dL | 100–129 mg/dL | ≥130 mg/dL |
|----------------------------------|-----------|-------------|-------------|---------------|------------|
| <b>ANCOVA with bootstrapping</b> |           |             |             |               |            |
| Direct costs, mean               | 2,331     | 2,401       | 2,407       | 2,619         | 2,837      |
| Indirect costs, mean             | 2,714     | 3,645       | 3,901       | 4,412         | 4,730      |
| <b>Poisson regression</b>        |           |             |             |               |            |
| Direct costs, mean               | 2,331     | 2,401       | 2,407       | 2,621         | 2,838      |
| Indirect costs, mean             | 2,714     | 3,645       | 3,901       | 4,412         | 4,731      |

ANCOVA, analysis of covariance; LDL-C, low-density lipoprotein cholesterol; MI, myocardial infarction.

**Table S5** Direct and indirect costs during the 18 months post MI, according to intensity of LLT: ANCOVA with bootstrapping versus Poisson regression models

|                                      | <b>Ezetimibe<br/>monotherapy</b> | <b>Low-intensity statin</b> | <b>Moderate-intensity<br/>statin</b> | <b>High-intensity statin</b> | <b>Ezetimibe with a<br/>statin</b> |
|--------------------------------------|----------------------------------|-----------------------------|--------------------------------------|------------------------------|------------------------------------|
| <b>ANCOVA with<br/>bootstrapping</b> |                                  |                             |                                      |                              |                                    |
| Direct costs, mean                   | 3,193                            | 2,586                       | 2,375                                | 2,576                        | 3,053                              |
| Indirect costs, mean                 | 4,505                            | 5,340                       | 5,353                                | 3,712                        | 3,514                              |
| <b>Poisson regression</b>            |                                  |                             |                                      |                              |                                    |
| Direct costs, mean                   | 3,191                            | 2,583                       | 2,375                                | 2,576                        | 3,051                              |
| Indirect costs, mean                 | 4,506                            | 5,341                       | 5,358                                | 3,716                        | 3,515                              |

ANCOVA, analysis of covariance; LLT, lipid-lowering therapy; MI, myocardial infarction.
